# Supplementary material for: Efficient bulk mass accommodation and dissociation of N 2 O 5 in neutral aqueous aerosol
Source: Copernicus journal article supplement (doi:10.5194/acp-17-6493-2017), 2017-06-01
Supplement: Supplementary file 2 [file acp-17-6493-2017-supplement.zip]

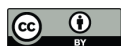

## *Supplement of*

# **Efficient bulk mass accommodation and dissociation of N<sub>2</sub>O<sub>5</sub> in neutral aqueous aerosol**

**Goran Gržinić et al.**

*Correspondence to:* Markus Ammann ([markus.ammann@psi.ch](mailto:markus.ammann@psi.ch))

- [acp-17-6493-2017-supplement-title-page.pdf](#)
- [N2O5\\_13N\\_aq\\_Mentelkinetics\\_Na2SO4\\_70RH.m](#)
- [N2O5\\_13N\\_aq\\_Mentelkinetics\\_NaNO3\\_70RH.m](#)
- [acp-2016-1118-supplement.pdf](#)
- [ode\\_N2O5\\_13N\\_aq\\_01.m](#)

The copyright of individual parts of the supplement might differ from the CC-BY 3.0 licence.
